# Supplementary material
Source: PubMed Central journal article supplement (PMC3255173)
Supplement: NIHMS320367-supplement-sup_data.pdf [file NIHMS320367-supplement-sup_data.pdf]

## SUPPLEMENTARY METHODS

**Enzyme Activity.** Activities were measured by monitoring the change in absorbance at 240 nm (catalase) and 420 nm (SOD1) using Lambda 25 UV VIS Spectrophotometer (Perkin Elmer Instruments, Waltham, MA or Ultrospec™ 2100 *pro*, Amersham Biosciences). As an example of SOD1 assay: 1 mL 60 mM Tris (pH 8.2) + 1 mM DTPA, 2  $\mu$ L pyrogallol (0.4 M) was added into both cuvettes, 1-6  $\mu$ L SOD1 (1 mg/mL) was then added into reference cuvette. As an example of catalase assay: 1 mL 60 mM phosphate buffer (pH 7.4), 1-15  $\mu$ L H<sub>2</sub>O<sub>2</sub> (5 mM – 8 M) and 1-6  $\mu$ L catalase (0.1 – 5  $\mu$ M) was added into sample cuvette. Catalase activity was evaluated by monitoring the decrease at A<sub>240</sub> resulting from the decomposition of H<sub>2</sub>O<sub>2</sub> (extinction coefficient at 240 nm: 43.6 M<sup>-1</sup>cm<sup>-1</sup>). As a quantitative SOD1 activity assay, enzyme concentration at which 50% inhibition of O<sub>2</sub><sup>-</sup> dismutation occurred was measured using luminol/xanthine/xanthine oxidase (Femtomaster FB 12, Zylux corporation, USA) and riboflavin/Nitro Blue Tetrazolium (NBT) assays.<sup>1,2</sup> The initial activity was 3780 U/mg protein for SOD1 and 2000 or 46500 U/mg protein for catalase (as indicated by the manufacturer).

## SUPPLEMENTARY TABLES

**Table S1.** Number-average diameter of selected nanozymes measured using AFM

| <b>Sample</b>                       | <b>Linker</b>   | <b>Small particles,<br/>nm</b> | <b>Big particles,<br/>nm</b> |
|-------------------------------------|-----------------|--------------------------------|------------------------------|
| SOD1                                | -               | 11 ± 1                         | 23 ± 3                       |
| SOD1/PEI-PEG; cl*                   | BS <sup>3</sup> | 21 ± 1                         | 45 ± 2                       |
| SOD1/PEI-PEG; cl                    | EDC/S-NHS       | 21 ± 2                         | 45 ± 3                       |
| SOD1/pLL <sub>10</sub> -PEG; cl     | EDC/S-NHS       | 21 ± 1                         | 40 ± 3                       |
| SOD1/pLL <sub>50</sub> -PEG; cl     | EDC/S-NHS       | 24 ± 3                         | 45 ± 2                       |
| catalase (cat)                      | -               | 20 ± 1                         | 100 ± 3                      |
| cat/PEI-PEG; cl                     | GA              | 25 ± 2                         | 41 ± 3                       |
| cat/PEI-PEG; cl                     | BS <sup>3</sup> | 24 ± 2                         | 50 ± 3                       |
| SOD1-cat/PEI-PEG; cl                | EDC/S-NHS       | 24 ± 1                         | 44 ± 3                       |
| SOD1-cat/pLL <sub>10</sub> -PEG; cl | EDC/S-NHS       | 22 ± 1                         | 34 ± 2                       |

\* cross-linked

## SUPPLEMENTARY FIGURES LEGEND

**Figure S1.** Dependence of the reaction rates on enzyme concentration. (A)  $O_2^{\cdot-}$  dismutation catalyzed by SOD1 monitored as inhibition of pyrogallol autoxidation (decrease in  $A_{420}$ ) measured in 60 mM Tris (pH 8.2) containing 0.8 mM pyrogallol at 25 °C. (B) Decomposition of hydrogen peroxide in the presence of native catalase ( $\square$ ) and GA cross-linked catalase/PEI-PEG ( $Z=1$ ) ( $\blacksquare$ ) measured in 60 mM phosphate buffer (pH 7.4) containing 8 mM  $H_2O_2$  at 25 °C.

**Figure S2.** Dependence of the reaction rate of hydrogen peroxide decomposition on substrate concentration (double reciprocal coordinates) in the presence of native catalase ( $\square$ ) and GA cross-linked catalase/PEI-PEG ( $Z=1$ ) ( $\blacksquare$ ) at a catalase concentration of 4 nM measured in 60 mM phosphate buffer (pH 7.4) at 25 °C.

**Figure S3.** Quantitative estimation SOD1 activity using (A) riboflavin/NBT in 50 mM  $KH_2PO_4$  (pH 7.8) buffer containing 2  $\mu$ M riboflavin and 57  $\mu$ M NBT and absorbance was measured at 560 nm. (B) Luminol/xanthine/xanthine oxidase assay in 50 mM bicarbonate buffer (pH 10.2) containing 0.33 mM luminol, 0.1 mM xanthine and 1 mM xanthine oxidase at 25 °C. Native SOD1 ( $\square$ ) and GA cross-linked SOD1/PEI-PEG ( $Z=1$ ) ( $\blacksquare$ ).

## **REFERENCES**

1. Bensinger RE, Johnson CM. Luminol assay for superoxide dismutase. *Anal Biochem* 1981;116:142-5.
2. Janknegt PJ, Rijstenbil JW, van de Poll WH, Gechev TS, Buma AG. A comparison of quantitative and qualitative superoxide dismutase assays for application to low temperature microalgae. *J Photochem Photobiol B* 2007;87:218-26.
