# Supplementary material
Source: PubMed Central journal article supplement (PMC3255173)

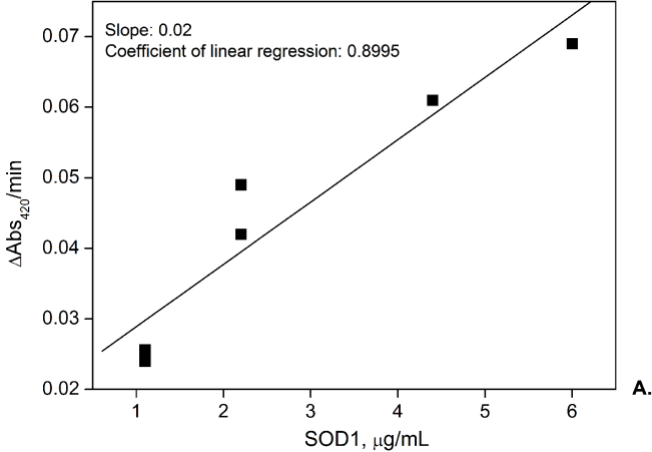

Supplement: NIHMS320367-supplement-sup_fig_1A.pdf [file NIHMS320367-supplement-sup_fig_1A.pdf]

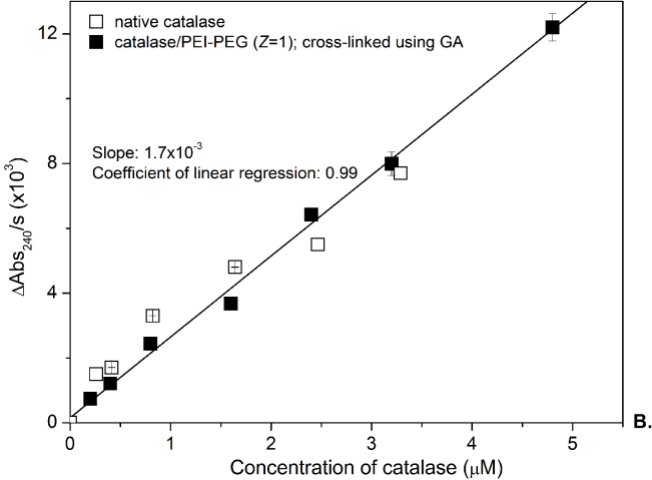

Supplement: NIHMS320367-supplement-sup_fig_1B.pdf [file NIHMS320367-supplement-sup_fig_1B.pdf]

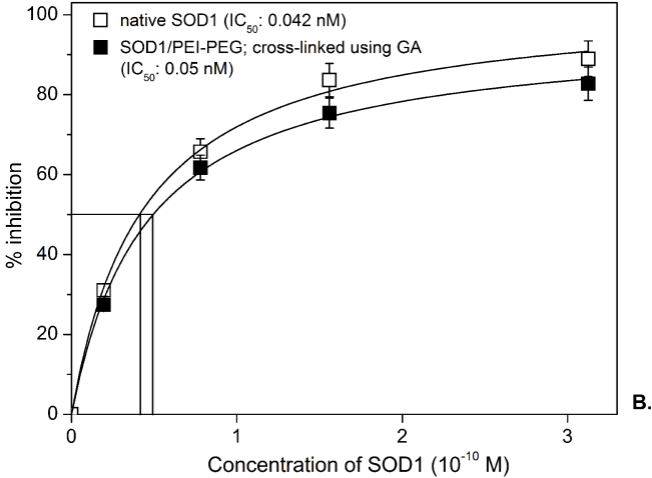

Supplement: NIHMS320367-supplement-sup_fig_3B.pdf [file NIHMS320367-supplement-sup_fig_3B.pdf]
